# Supplementary material for: Radiative emission from Cu2ZnSnS4/ZnSn core/shell nanocrystals
Source: Royal Society of Chemistry journal article supplement (doi:10.1039/c9tc00904c), 2019-01-01
Supplement: c9tc00904c1.pdf [file c9tc00904c1.pdf]

## Supporting information

### Radiative Emission from $\text{Cu}_2\text{ZnSnS}_4/\text{ZnSn}$ Core/Shell Nanocrystals

A. Irkhina,<sup>a</sup> S. Levchenko,<sup>a</sup> L. Xie,<sup>b</sup> K. Leifer,<sup>b</sup> and T. Unold<sup>a</sup>

<sup>a</sup>Department Structure and Dynamics of Energy Materials, Helmholtz-Zentrum Berlin für Materialien und Energie, Hahn-Meitner-Platz 1, 14109 Berlin, Germany

<sup>b</sup>The Ångström Laboratory, Department of Engineering Sciences, Uppsala University, Lägerhyddsvägen 1 Box 534, 75121 Uppsala, Sweden

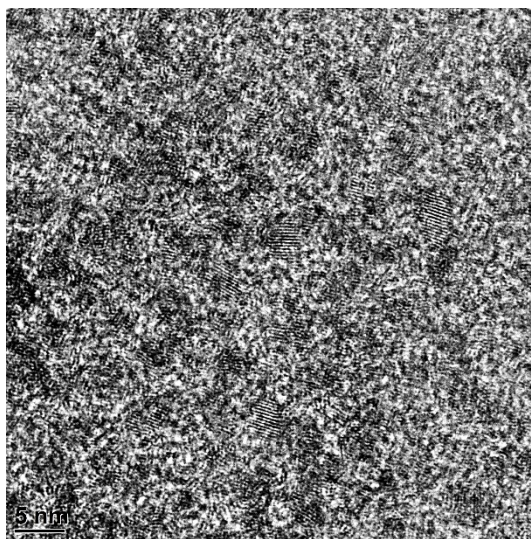

Figure S1. TEM image of CZTS core after 40 minutes of growth at 225 °C

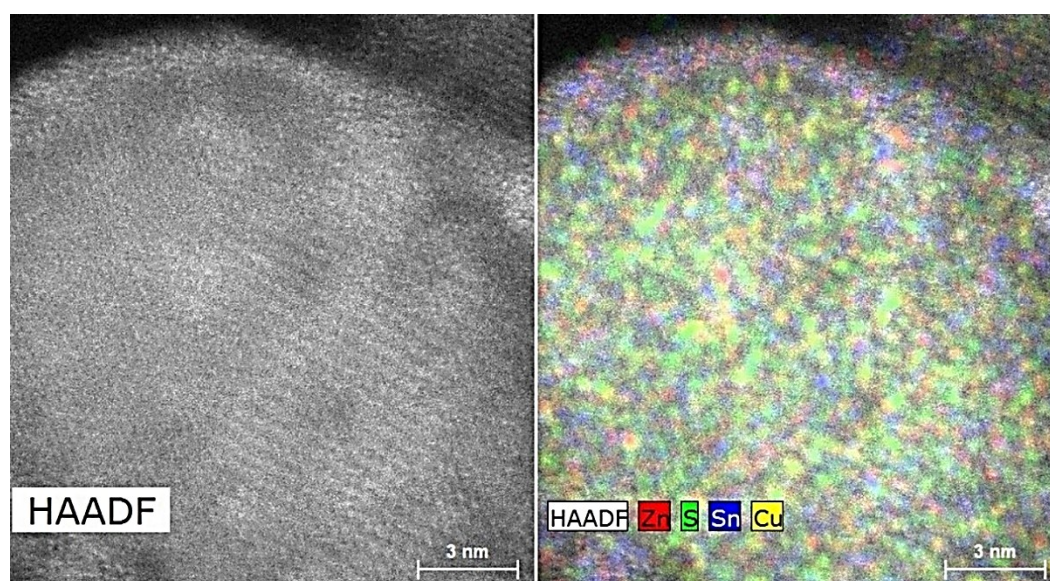

Figure S2. STEM-HAADF image and STEM-EDX elemental maps of CZTS/ZnSn core/shell NCs obtained at 160 °C and maximum  $\text{Zn}_{\text{shell}}/\text{Cu}$  feeding molar ration of 4.5.

**Table S1.** Standart reaction potential at 25 °C.

| Half-reaction                                             | $E^0(\text{V})$ |
|-----------------------------------------------------------|-----------------|
| $\text{Sn}^{4+} + 2\text{e}^- \rightarrow \text{Sn}^{2+}$ | 0.13            |
| $\text{Sn}^{2+} + 2\text{e}^- \rightarrow \text{Sn}^0$    | -0.14           |
| $\text{Zn}^{2+} + 2\text{e}^- \rightarrow \text{Zn}^0$    | -0.76           |

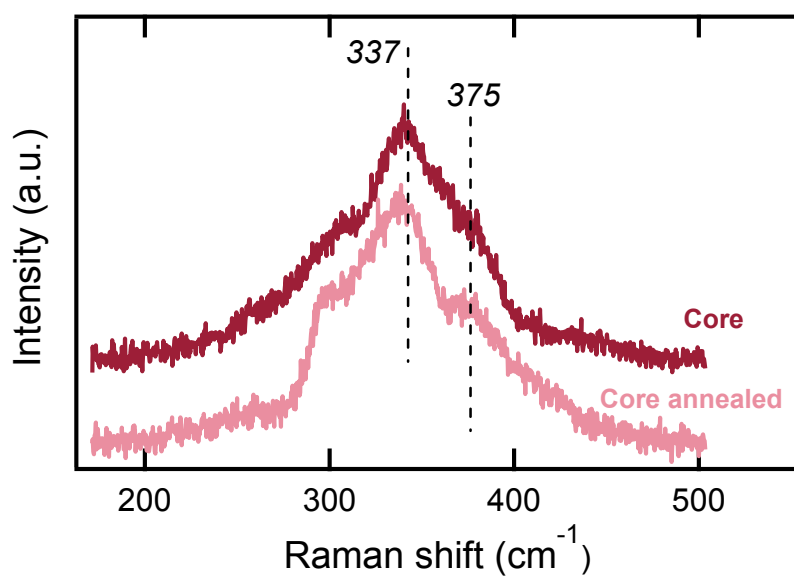

Figure S3. Raman spectra of core CZTS nanocrystals obtained at 225°C and additionally annealed with Zn oleate NCs (core annealed).
